# Supplementary material
Source: PubMed Central journal article supplement (PMC5714304)
Supplement: NIHMS899307-supplement-1.pdf [file NIHMS899307-supplement-1.pdf]

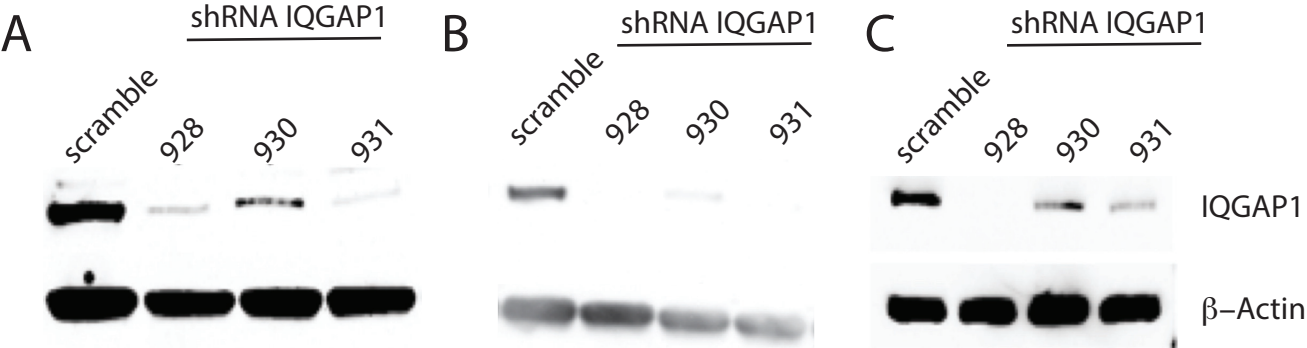

Supplemental Figure 1: IQGAP1 levels in human transformed cell lines transduced with shRNA lentivirus. Total cell lysates were probed with rabbit anti-IQGAP1 (Abcam) and  $\beta$ -actin-HRP. A) THP1 cells; B) THP1-dual cells; C) HeLa cells. Scramble refers to a non-silencing shRNA control.

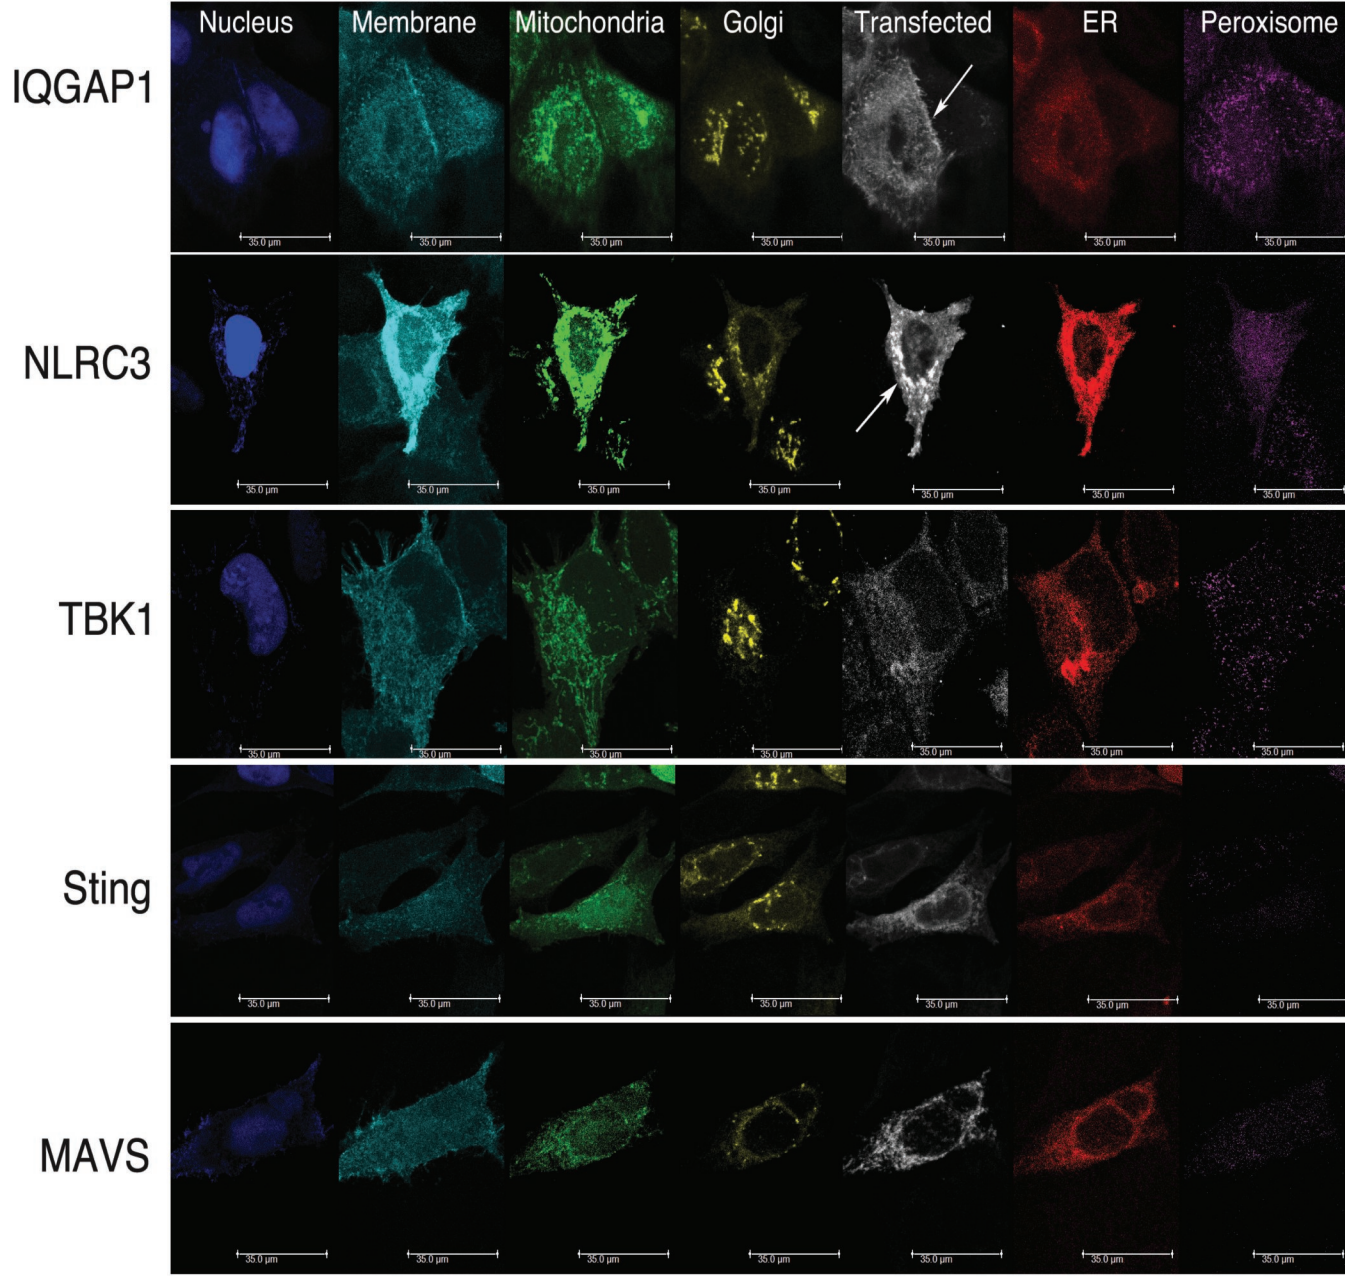

Supplemental Figure 2: Confocal microscopy of SW480 cells co-transfected with epitope tagged IQGAP1, NLRC3, TBK1, STING or MAVS and ColorfulCell. Cells were fixed, permeabilized and stained with antibodies specific to the epitope tag followed by Alexa Fluor 546 secondary antibodies. Specific subcellular localizations are highlighted by unique fluorescent proteins. The nucleus=Blue via a nuclear localization signal sequence (NLS), the plasma membrane=Cyan via a Lyn-fusion protein which contains a myristoylation and palmitoylation signal sequence, mitochondria=green via a mitochondria targeting sequence (MTS) from COX4, golgi apparatus=yellow via a golgi targeting sequence (GTS) from Golgi phosphoprotein 2, transfected epitope tagged construct=white, endoplasmic reticulum=red via an N-terminal endoplasmic reticulum localization sequence from Calreticulin and a C-terminal KDEL sequence and peroxisome=magenta via the three amino acid sequence SKL. Cells are representative of more than three independent transfections.
